# Supplementary material
Source: publisher figshare collection journal article supplement (https://gsajournals.figshare.com/ndownloader/files/25768499)
Supplement: Supplementary file 1 [file 25768499]

## Sheet: Sheet1
Table S1. Existing bioinformatics tools for colony-based screen image analysis and normalization.
Tool	Experimental Design	User Input	Normalization Options	Output	Reference #
HT Colony Grid Analyzer	Synthetic genetic arrays (SGA), Epistatic miniarray profile (E-MAP)	96 to 1536 density plate images	Plate middle mean (PMM) normalization	Averaged S Scores	(Collins et al. 2006)
		Assign top left colony position	Filter strain based on noise and linkage
Colonyzer	Any rectangular array format	48 to 1536 density in rectangular or circular petri dish	Spatial lighting gradient	Raw colony size	(Lawless et al. 2010)
			Median background intensity correction	Integrated optical density (IOD)
				Colony color
				Colony granularity
Balony	Any plate-based array	Single or composite images	Plate median correction	Raw colony size	(Young and Loewen 2013)
			Row/Column	Normalized colony size
			Spatial correction for media thickness	Genetic interaction results
			Competition
			Filter strain based on linkage (for SGA)
ScreenMill	SGA	384 to 1536 single or composite image	Artifact removal	Raw colony size	(Dittmar et al. 2010)
			Plate median correction	Growth ratio, z-value, p-value, position data
Spotsizer	Any plate-based array	Plate images		Raw colony size	(Bischof et al. 2016)
Gitter	Any plate-based array	Plate images		Raw colony size	(Wagih and Parts 2014)
SGAtools	Any plate-based array	96 to 1536 density plate images	Plate middle mean (PMM) normalization	Raw colony size	(Wagih et al. 2013)
			Row/Column	Normalized colony size
			Spatial correction for media thickness	Genetic interaction results
			Competition	GO enrichment
			Batch
			Filter for large colonies and linkage (for SGA)
Scan-o-matic	Time lapsed plate-based array	Composite time-lapsed images from custom setup	Light/color correction	Raw colony size	(Zackrisson et al. 2016)
			Population size estimation	Population size estimates
			Growth curve smoothing	Growth parameters
			Reference surface-based doubling time normalization
MATLAB Colony Analyzer Toolkit	Any plate-based array	96 to 24576 density plate images	Plate mode correction	Raw colony size	(Bean et al. 2014)
			Edge correction	Normalized colony size
			Source-based normalization	Colony color
			Local median filter	Pixel intensity
LI Detector	Any plate-based array	96 to 24576 density plate images	Local artifact	Local artifact corrected colony size	Current study
			Source-based normalization	Reference-based background colony size
			Local reference-based normalization	Relative fitness
